# Supplementary material
Source: PubMed Central journal article supplement (PMC3591679)
Supplement: supp_jc.2012-2804v1_12-2804_Supplemental_Table.pdf [file supp_jc.2012-2804v1_12-2804_Supplemental_Table.pdf]

| Supplemental Table 1. Adverse Events                                                                                                                   |                       |                       |                     |      |      |      |
|--------------------------------------------------------------------------------------------------------------------------------------------------------|-----------------------|-----------------------|---------------------|------|------|------|
| Adverse Event                                                                                                                                          | Alendronate<br>(n=43) | Zoledronate<br>(n=41) | Reference<br>(n=27) | (a)  | (b)  | (c)  |
| Death                                                                                                                                                  | 0 (0%)                | 1 (2%)                | 2 (7%)              | 0.96 | 0.85 | 0.30 |
| Hospitalization <sup>1</sup>                                                                                                                           | 14 (33%)              | 20 (49%)              | 15 (56%)            | 0.24 | 0.80 | 0.12 |
| Infection <sup>2</sup>                                                                                                                                 | 11 (26%)              | 14 (34%)              | 10 (37%)            | 0.54 | 1.00 | 0.45 |
| Rejection <sup>3</sup>                                                                                                                                 | 2 (5%)                | 4 (10%)               | 4 (15%)             | 0.66 | 0.94 | 0.32 |
| Flu-like symptoms after zoledronate or matching placebo                                                                                                | 1 (2%)                | 2 (5%)                | 0 (0%)              | 0.98 | 0.86 | 1.00 |
| Hypocalcemia <sup>4,5</sup>                                                                                                                            | 5 (12%)               | 4 (10%)               | 1 (4%)              | 1.00 | 0.90 | 0.60 |
| Serum creatinine > 2.0 mg/dl <sup>6</sup>                                                                                                              | 7 (16%)               | 1 (2%)                | 2 (7%)              | 0.09 | 0.85 | 0.64 |
| Bone pain                                                                                                                                              | 0 (0%)                | 0 (0%)                | 0 (0%)              |      |      |      |
| Permanent discontinuation of alendronate/placebo <sup>7,8</sup>                                                                                        | 0 (0%)                | 2 (5%)                |                     | 0.48 |      |      |
| Atrial fibrillation                                                                                                                                    | 0 (0%)                | 2 (5%)                | 2 (7%)              | 0.47 | 1.00 | 0.29 |
| Gastrointestinal Effects                                                                                                                               |                       |                       |                     |      |      |      |
| Bleeding                                                                                                                                               | 0 (0%)                | 0 (0%)                | 0 (0%)              |      |      |      |
| Heartburn                                                                                                                                              | 1 (2%)                | 1 (2%)                | 1 (4%)              | 1.00 | 1.00 | 1.00 |
| Abdominal Pain                                                                                                                                         | 2 (5%)                | 1 (2%)                | 1 (4%)              | 1.00 | 1.00 | 1.00 |
| Nausea                                                                                                                                                 | 1 (2%)                | 1 (2%)                | 0 (0%)              | 1.00 | 1.00 | 1.00 |
| Vomiting                                                                                                                                               | 0 (0%)                | 1 (2%)                | 0 (0%)              | 0.98 | 1.00 | na   |
| Diarrhea                                                                                                                                               | 1 (2%)                | 2 (5%)                | 1 (4%)              | 0.98 | 1.00 | 1.00 |
| (a) Alendronate vs Zoledronate group difference                                                                                                        |                       |                       |                     |      |      |      |
| (b) Zoledronate vs Reference group difference                                                                                                          |                       |                       |                     |      |      |      |
| (c) Alendronate vs Reference group difference                                                                                                          |                       |                       |                     |      |      |      |
| 1. Includes all hospital readmissions after randomization or enrollment in the case of the reference group.                                            |                       |                       |                     |      |      |      |
| 2. Includes all infections due to cytomegalovirus and all other infections that necessitated hospitalization, intravenous antibiotic therapy, or both. |                       |                       |                     |      |      |      |
| 3. Rejection after month 1 necessitating change in immunosuppressive regimen                                                                           |                       |                       |                     |      |      |      |
| 4. Albumin-corrected serum calcium below 8.0 mg/dL.                                                                                                    |                       |                       |                     |      |      |      |
| 5. To convert values for serum calcium to millimoles per liter, multiply by 0.2495.                                                                    |                       |                       |                     |      |      |      |
| 6. At any visit after randomization. To convert values for serum creatinine to millimoles per liter, multiply by 88.4.                                 |                       |                       |                     |      |      |      |

7. All gastrointestinal symptoms were adjudicated by observers who were unaware of the treatment-group assignments.
8. Patients in whom alendronate or placebo was permanently discontinued because of gastrointestinal symptoms.
